# Supplementary material
Source: PubMed Central journal article supplement (PMC4347984)

## Vocalizers' selection

### Constant Vocalizers

- 1 adult male (BlaBla0506)
- 1 adult female (WhiBlu4917)
- 1 male chick (LbIBlu2028)
- 1 female chick (LbIBlu1630)

### Random Vocalizers

- 2 adult males
- 2 adult females
- 2 male chicks
- 2 female chicks  
(ex: GraGre0813, LbIBlu1927)

## Identification of call types available

Distance calls  
Distress calls  
Nest calls  
Tet calls  
Wsst calls  
Thuk call

Begging calls  
Long Tonal calls

## Random selection of 3 exemplars

WhiBlu4917 Distance call 1  
WhiBlu4917 Distance call 14  
WhiBlu4917 Distance call 23

GraGre0813 Begging call 5  
GraGre0813 Begging call 8  
GraGre0813 Begging call 12

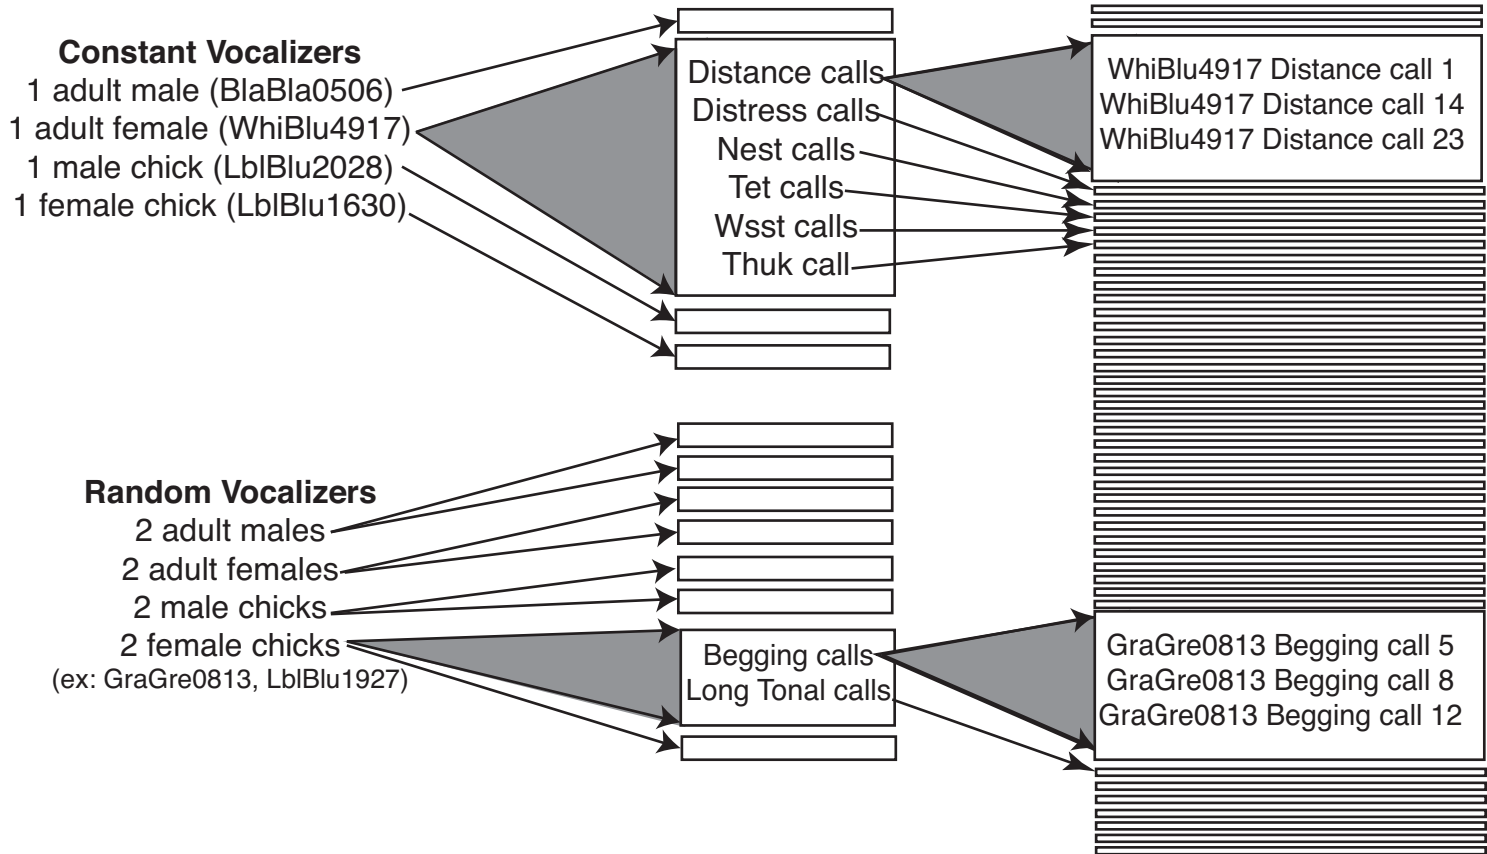

**A**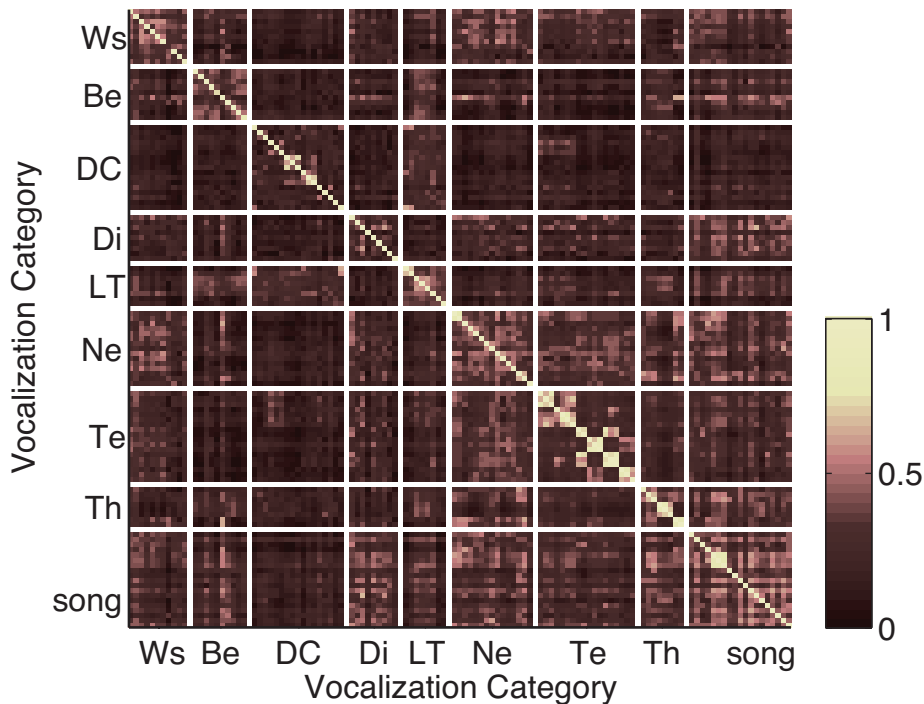**B**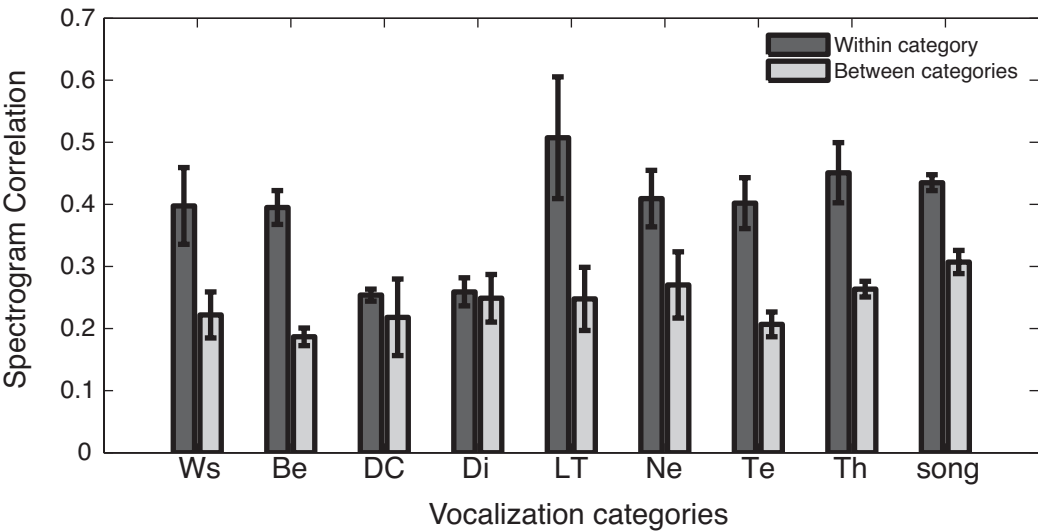

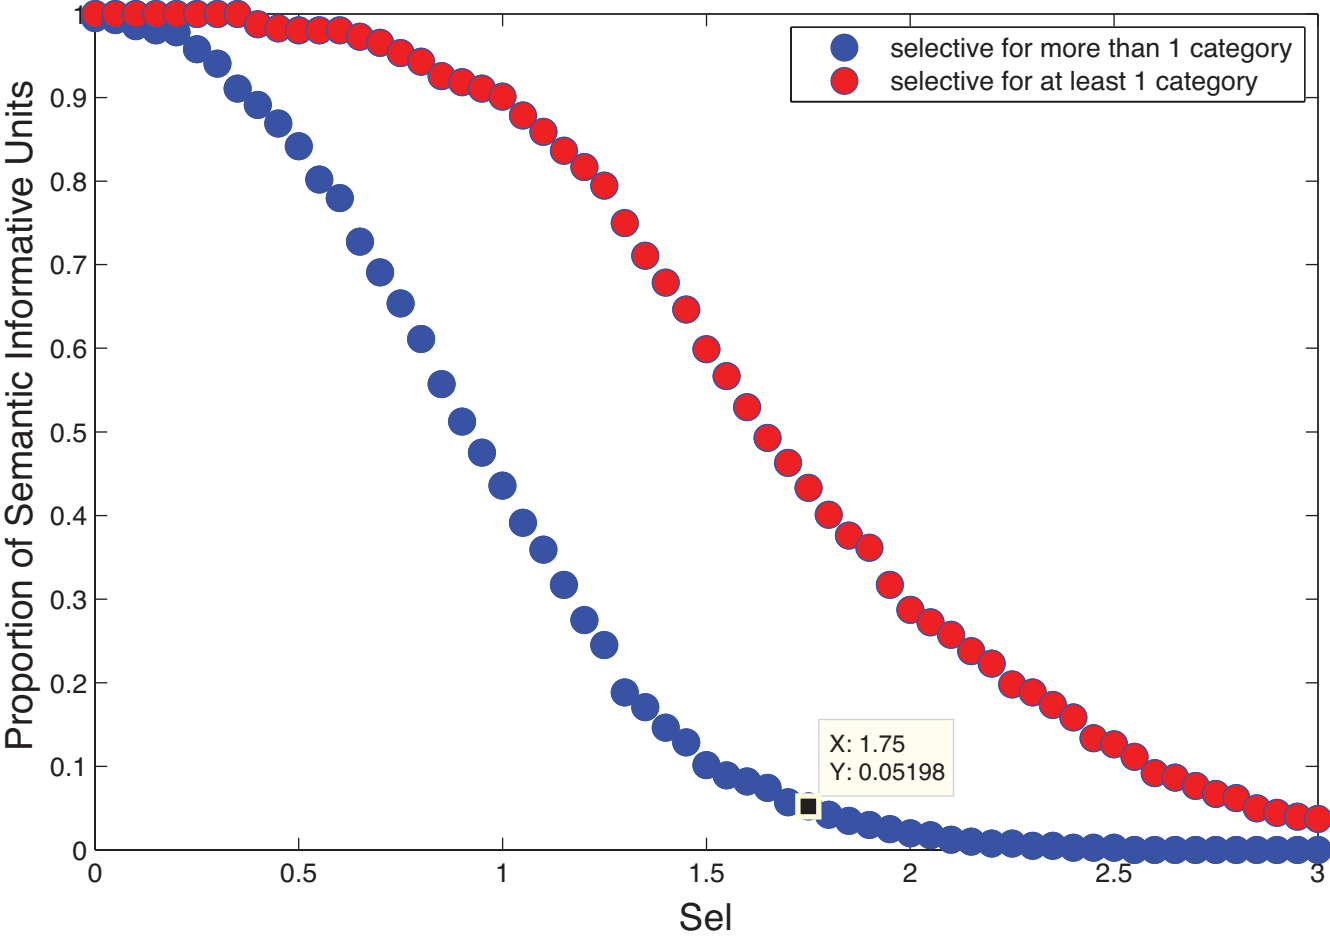

**A**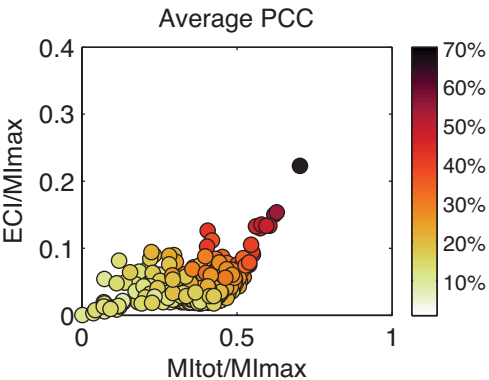**B**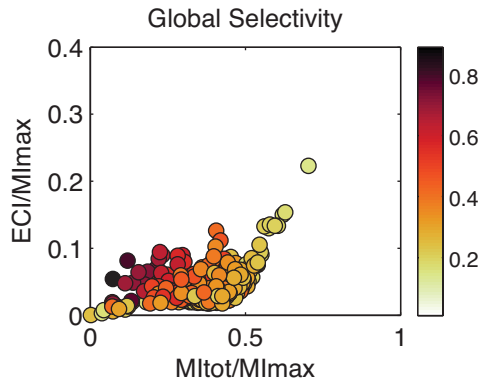**C**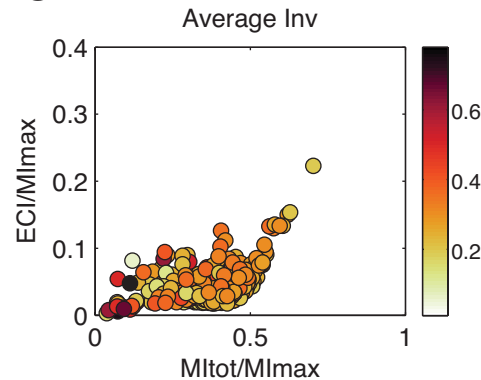**D**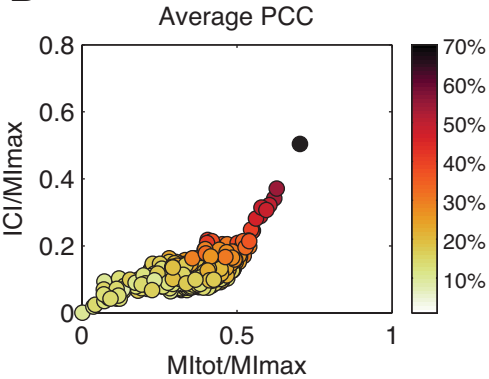**E**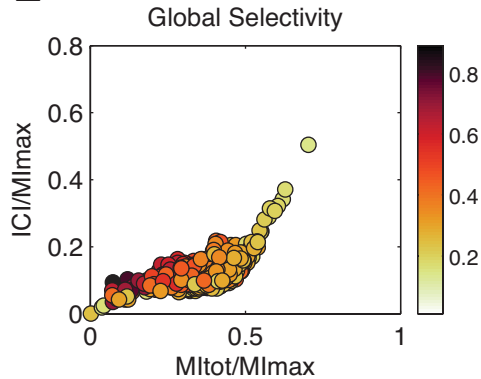**F**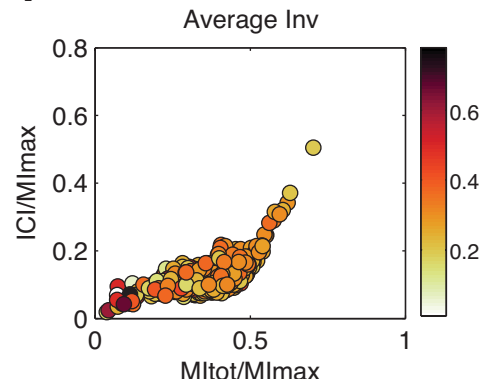

Supplement: NIHMS646188-supplement-Supp_FigureS1-S4.pdf [file NIHMS646188-supplement-Supp_FigureS1-S4.pdf]
